# Supplementary material for: Temperature changes derived from phenological and natural evidence in South Central China from 1850 to 2008
Source: Copernicus journal article supplement (doi:10.5194/cp-11-1553-2015), 2015-11-20
Supplement: Supplementary file 1 [file cp-11-1553-2015-supplement.pdf]

Supplement of *Clim. Past*, 11, 1553–1561, 2015  
<http://www.clim-past.net/11/1553/2015/>  
doi:10.5194/cp-11-1553-2015-supplement  
© Author(s) 2015. CC Attribution 3.0 License.

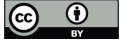

Climate  
of the Past

Open Access

The logo for the European Geosciences Union (EGU), featuring the letters 'EGU' in a bold, sans-serif font, with a stylized gear or circular element behind the 'E'.

*Supplement of*

## **Temperature changes derived from phenological and natural evidence in South Central China from 1850 to 2008**

**J. Zheng et al.**

*Correspondence to:* Z. Hao (haozx@igsnr.ac.cn)

The copyright of individual parts of the supplement might differ from the CC-BY 3.0 licence.

1  
2  
3  
4  
5

## Supporting Information

**S1 Table. Phenological records derived from historical dairies in Central China during 1862-1916**

| Year | Location                    | Species <sup>a</sup> and phenophase    | Date <sup>b</sup> | Name of Dairy <sup>c</sup>   |
|------|-----------------------------|----------------------------------------|-------------------|------------------------------|
| 1862 | Chenzhou, 25.8°N, 113.0°E   | <i>PB</i> , End of flowering           | 4/17              | The Dairy of Tanyuan         |
| 1864 | Guanyintan, 26.5°N, 111.9°E | <i>PP</i> , Late period of flowering   | 3/25              | The Dairy of Tanyuan         |
| 1868 | Changsha, 28.2°N, 112.9°E   | <i>SB</i> , Late period of leaf        | 4/1               | The Dairy of Tanyuan         |
| 1874 | Gushui, 27.8°N, 112.2°E     | <i>PP</i> , Late period of flowering   | 4/7               | The Dairy of Guo Songtao     |
| 1878 | Wuhan, 30.6°N, 114.3°E      | <i>MH</i> , First flowering            | 3/23              | The Dairy of Fan Zanchen     |
|      | Wuhan, 30.6°N, 114.3°E      | <i>MH</i> , Full of flowering          | 3/25              | The Dairy of Fan Zanchen     |
|      | Wuhan, 30.6°N, 114.3°E      | <i>PSu</i> , End of flowering          | 4/14              | The Dairy of Fan Zanchen     |
| 1882 | Changsha, 28.2°N, 112.9°E   | <i>PSu</i> , Full of flowering         | 4/4               | The Dairy of Guo Songtao     |
| 1883 | Wuhan, 30.6°N, 114.3°E      | <i>PM</i> , Full of flowering          | 3/3               | The Dairy of Fan Zanchen     |
| 1884 | Changsha, 28.2°N, 112.9°E   | <i>PSu</i> , Full of flowering         | 4/1               | The Dairy of Guo Songtao     |
| 1888 | Wuhan, 30.6°N, 114.3°E      | <i>PSu</i> , First flowering           | 4/18              | The Dairy of Fan Zanchen     |
|      | Changsha, 28.2°N, 112.9°E   | <i>PP</i> , Full of flowering          | 3/22              | The Dairy of Xiangqi-Lou     |
|      | Changsha, 28.2°N, 112.9°E   | <i>MH</i> , First flowering            | 3/22              | The Dairy of Xiangqi-Lou     |
| 1889 | Wuhan, 30.6°N, 114.3°E      | <i>PSu</i> , Early period of flowering | 4/24              | The Dairy of Fan Zanchen     |
| 1890 | Changsha, 28.2°N, 112.9°E   | <i>PSu</i> , First flowering           | 4/1               | The Dairy of Xiangqi-Lou     |
| 1891 | Zhuzhou, 27.6°N, 113.2°E    | <i>PP</i> , Full of flowering          | 3/28              | The Dairy of Xiangqi-Lou     |
|      |                             | <i>PSa</i> , Late period of flowering  | 3/28              | The Dairy of Xiangqi-Lou     |
| 1892 | Hengyang, 26.9°N, 112.6°E   | <i>PP</i> , First flowering            | 3/19              | The Dairy of Xiangqi-Lou     |
| 1893 | Hengyang, 26.9°N, 112.6°E   | <i>PP</i> , First flowering            | 3/24              | The Dairy of Xiangqi-Lou     |
| 1894 | Jingzhou, 30.3°N, 112.2°E   | <i>PSu</i> , Full of flowering         | 4/13              | The Dairy of Lianrangxianju  |
|      | Changsha, 28.2°N, 112.9°E   | <i>MH</i> , Late period of flowering   | 3/24              | The Dairy of Xiangqi-Lou     |
| 1895 | Jingzhou, 30.3°N, 112.2°E   | <i>PSu</i> , Full of flowering         | 4/18              | The Dairy of Lianrangxianju  |
|      | Xiangtan, 27.8°N, 112.9°E   | <i>PP</i> , Full of flowering          | 3/21              | The Dairy of Xiangqi-Lou     |
| 1896 | Changsha, 28.2°N, 112.9°E   | <i>PP</i> , Swelling of bud            | 2/16              | The Dairy of Xiangqi-Lou     |
|      | Changsha, 28.2°N, 112.9°E   | <i>PSe</i> , Full of flowering         | 3/13              | The Dairy of Xiangqi-Lou     |
| 1897 | Wuxue, 29.8°N, 115.6°E      | <i>SB</i> , Late period of leaf        | 3/19              | The Dairy of Returning South |
| 1898 | Jingzhou, 30.3°N, 112.2°E   | <i>PSu</i> , Full of flowering         | 4/9               | The Dairy of Lianrangxianju  |
|      | Xiangtan, 27.8°N, 112.9°E   | <i>PP</i> , Full of flowering          | 3/30              | The Dairy of Xiangqi-Lou     |
|      | Xiangtan, 27.8°N, 112.9°E   | <i>PSa</i> , Late period of flowering  | 3/30              | The Dairy of Xiangqi-Lou     |
| 1899 | Hengyang, 26.9°N, 112.6°E   | <i>PP</i> , Full of flowering          | 3/15              | The Dairy of Xiangqi-Lou     |
|      |                             | <i>PA</i> , Late period of flowering   | 3/15              | The Dairy of Xiangqi-Lou     |
| 1900 | Changsha, 28.2°N, 112.9°E   | <i>PSu</i> , Full of flowering         | 4/14              | The Dairy of Xiangqi-Lou     |
| 1901 | Xiangtan, 27.8°N, 112.9°E   | <i>PSa</i> , Late period of flowering  | 3/22              | The Dairy of Xiangqi-Lou     |
| 1902 | Xiangtan, 27.8°N, 112.9°E   | <i>CC</i> , Full of flowering          | 3/13              | The Dairy of Xiangqi-Lou     |
| 1905 | Xiangtan, 27.8°N, 112.9°E   | <i>PSu</i> , First flowering           | 4/20              | The Dairy of Xiangqi-Lou     |

|      |                           |                                       |      |                          |
|------|---------------------------|---------------------------------------|------|--------------------------|
| 1906 | Xiangtan, 27.8°N, 112.9°E | <i>PSa</i> , Full of flowering        | 3/13 | The Dairy of Xiangqi-Lou |
| 1907 | Xiangtan, 27.8°N, 112.9°E | <i>PSu</i> , First flowering          | 4/11 | The Dairy of Xiangqi-Lou |
| 1908 | Xiangtan, 27.8°N, 112.9°E | <i>PP</i> , Late period of flowering  | 3/24 | The Dairy of Xiangqi-Lou |
| 1909 | Xiangtan, 27.8°N, 112.9°E | <i>PP</i> , Full of flowering         | 4/3  | The Dairy of Xiangqi-Lou |
| 1910 | Xiangtan, 27.8°N, 112.9°E | <i>PSu</i> , Late period of flowering | 4/16 | The Dairy of Xiangqi-Lou |
| 1911 | Xiangtan, 27.8°N, 112.9°E | <i>PP</i> , Late period of flowering  | 3/28 | The Dairy of Xiangqi-Lou |
| 1912 | Xiangtan, 27.8°N, 112.9°E | <i>PP</i> , Full of flowering         | 3/23 | The Dairy of Xiangqi-Lou |
| 1913 | Xiangtan, 27.8°N, 112.9°E | <i>PP</i> , Late period of flowering  | 3/25 | The Dairy of Xiangqi-Lou |
| 1914 | Xiangtan, 27.8°N, 112.9°E | <i>PA</i> , Late period of flowering  | 3/9  | The Dairy of Xiangqi-Lou |
| 1915 | Xiangtan, 27.8°N, 112.9°E | <i>PP</i> , First flowering           | 3/21 | The Dairy of Xiangqi-Lou |
| 1916 | Xiangtan, 27.8°N, 112.9°E | <i>PP</i> , Full of flowering         | 4/2  | The Dairy of Xiangqi-Lou |

6 <sup>a</sup> Abbreviation of Species: *PB*-*Pyrus bretschneideri*; *PP*-*Prunus persica*; *SB*-*Salix babylonica*; *MH*-*Malus halliana*; *PSu*-*Paeonia*  
7 *suffruticosa*; *PM*-*Prunus mume*; *PSa*-*Prunus salicina*; *PSe*-*Prunus serrulata*; *PA*-*Prunus armeniaca*; *CC*-*Cercis chinensis*.

8 <sup>b</sup> Format of date: month/day.

9 <sup>c</sup> Author of dairies: The Dairy of Tanyuan by Yang Enshou; The Dairy of Xiangqi-Lou by Wang Kaiyun; The Dairy of  
10 Lianrangxianju, by Fan Zanchen; The Dairy of Returning South by Liu Han. The Dairy of Guo Songtao, and Fan Zanchen are  
11 titled by author name. Manuscripts of all dairies were deposited in Beijing Library (National Library of China now), which the  
12 Dairy of Guo Songtao had been reprinted and published in 1983 by Hunan People's publishing house, the Dairy of Xiangqi-Lou  
13 and the Dairy of Tanyuan had been reprinted and published in 1997 and 2009 respectively by Yuelu publishing house.
